# Supplementary material
Source: MDPI journal article supplement (https://www.mdpi.com/2079-6412/13/3/616)
Supplement: s1 [file s1 › coatings-2160221-SI.pdf]

# Supplementary Materials: The Anti-Snow Behaviour of Icephobic Coatings: Laboratory and In-Field Testing

Marcella Balordi <sup>1,\*</sup>, Giorgio Santucci de Magistris <sup>1</sup>, Alessandro Casali <sup>1,2</sup>, Francesco Pini <sup>1,3</sup>, Andrea Cammi <sup>1</sup>, Matteo Lacavalla <sup>4</sup> and Vincenzo Rotella <sup>4</sup>

<sup>1</sup> RSE, Ricerca sul Sistema Energetico, Strada Torre della Razza, 29122 Piacenza, Italy

<sup>2</sup> Department of Chemical Science, Life Sciences and Environmental Sustainability, University of Parma, Parco Area Scienze 17/A, 43124 Parma, Italy

<sup>3</sup> Facoltà di Scienze Chimiche, Università Degli Studi di Pavia, viale Taramelli 12, 27100 Pavia, Italy

<sup>4</sup> RSE, Ricerca sul Sistema Energetico, via Rubattino 54, 20134 Milano, Italy

\* Correspondence: marcella.balordi@rse-web.it

Testing procedure for shear stress adhesion test.

Aluminum alloy bars were used as test samples; they were frozen in an aluminum alloy mold, in 40 ml of deionized water at  $-19^{\circ}\text{C}$  for at least 8 h. After this period, the mold was fixed into the machine and the sample was extracted from the ice with a speed of 4 mm/min.

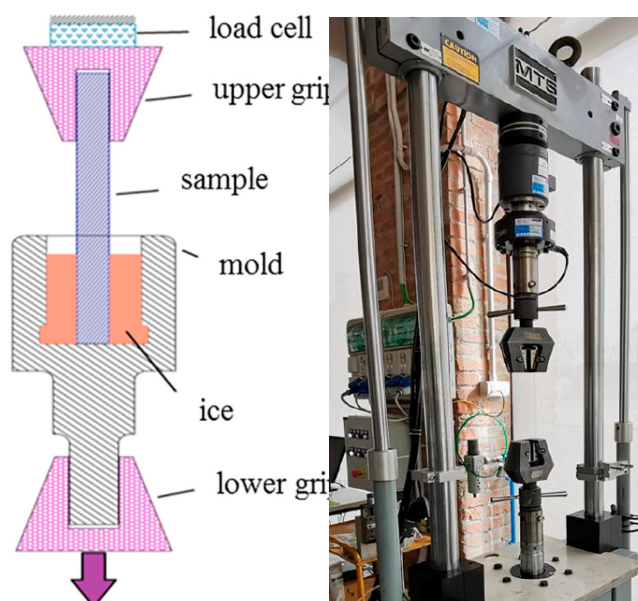

**Citation:** Balordi, M.; Santucci de Magistris, G.; Casali, A.; Pini, F.; Cammi, A.; Lacavalla, M.; Rotella, V. The Anti-Snow Behaviour of Icephobic Coatings: Laboratory and In-Field Testing. *Coatings* **2023**, *13*, 616. <https://doi.org/10.3390/coatings13030616>

Academic Editor(s): Yizhou Shen; Emerson Coy

Received: 29 December 2022

Revised: 8 March 2023

Accepted: 10 March 2023

Published: 14 March 2023

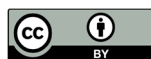

**Figure S1.** Schematic representation of the shear stress home-made apparatus and a picture of the tensile machine used.

**Copyright:** © 2023 by the authors.

Licensee MDPI, Basel, Switzerland.

This article is an open access article distributed under the terms and conditions of the Creative Commons Attribution (CC BY) license

(<https://creativecommons.org/licenses/by/4.0/>).

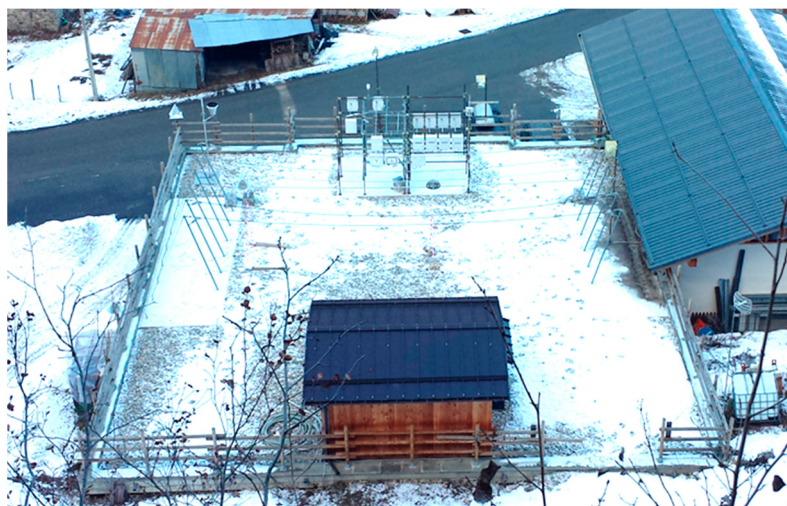

Figure S2. Wild outdoor test facility top view.

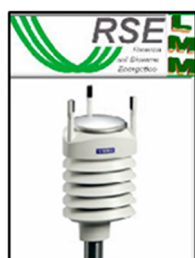

Vaisala Multi-variables  
for temperature and  
humidity

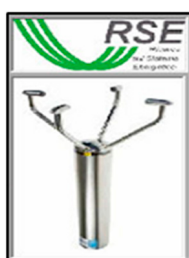

Sonic anemometer

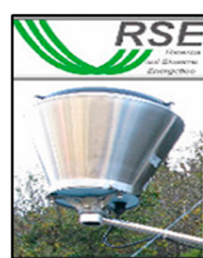

Rain gauge

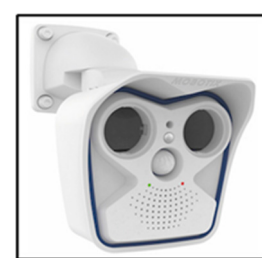

Webcam Mobotix

Figure S3. Monitoring devices in WILD station.

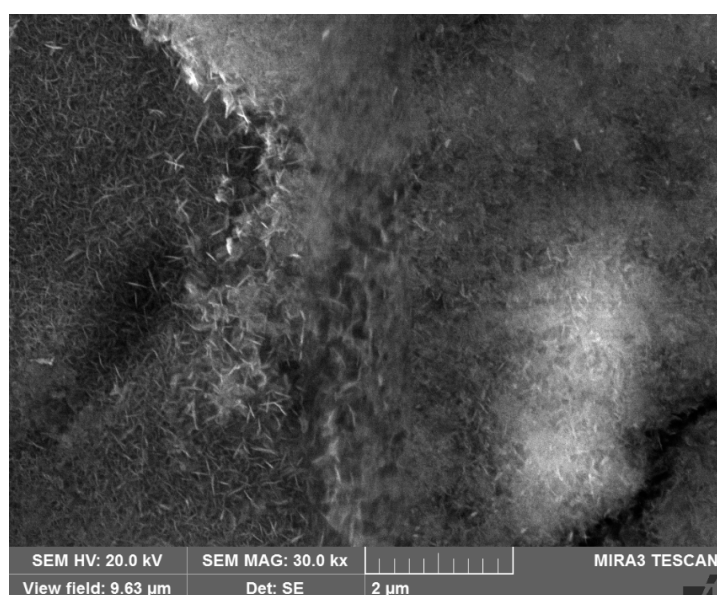

Figure S4. Morphology of the nanostructured pseudo-boehmite.

SEM image was collected at 30 kx magnification (Inlens).

**Thickness estimation**

The thickness of the boehmite layer was estimated using a relationship obtained in the work of Ryder et. al. "Andrew N. Rider (2001) The influence of porosity and morphology of hydrated oxide films on epoxy-aluminum bond durability, Journal of Adhesion Science and Technology, 15:4, 395–422, DOI: 10.1163/156856101300157524". The equation relates the oxide thickness and the boiling time of aluminum substrates. The thickness was obtained employing AFM measurements.

The equation is as follows:

$$y = 0.28 + 0.18 \log x \quad (1)$$

where  $y$  is the thickness of the oxide layer ( $\mu\text{m}$ ) and  $x$  is the boiling time (min)

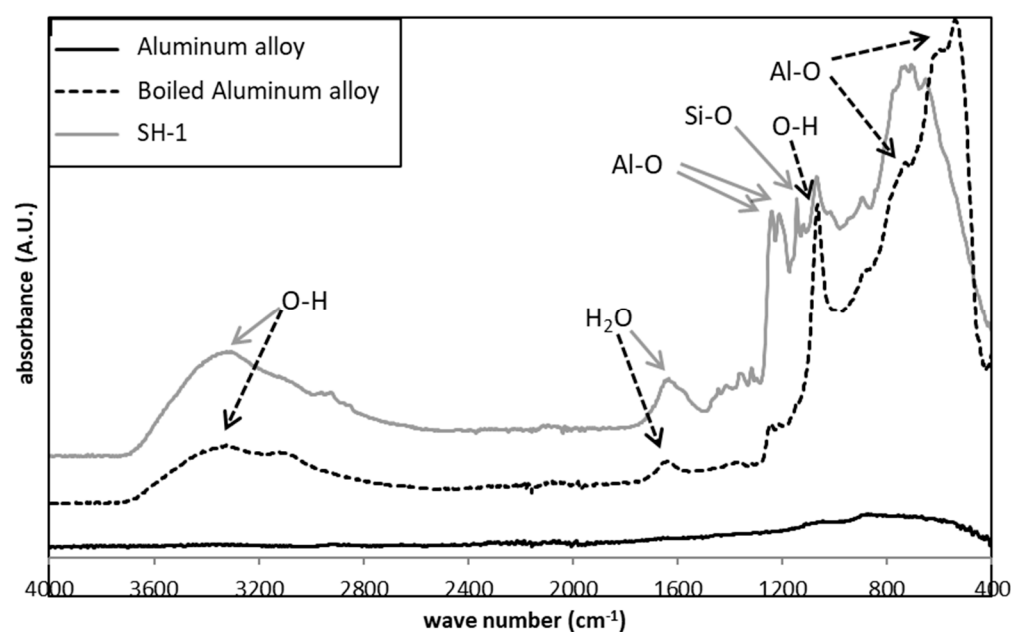

**Figure S5.** FTIR-ATR spectra of bare aluminum alloy, boiled aluminum alloy and SH-1. The main vibrational bands are indicated.

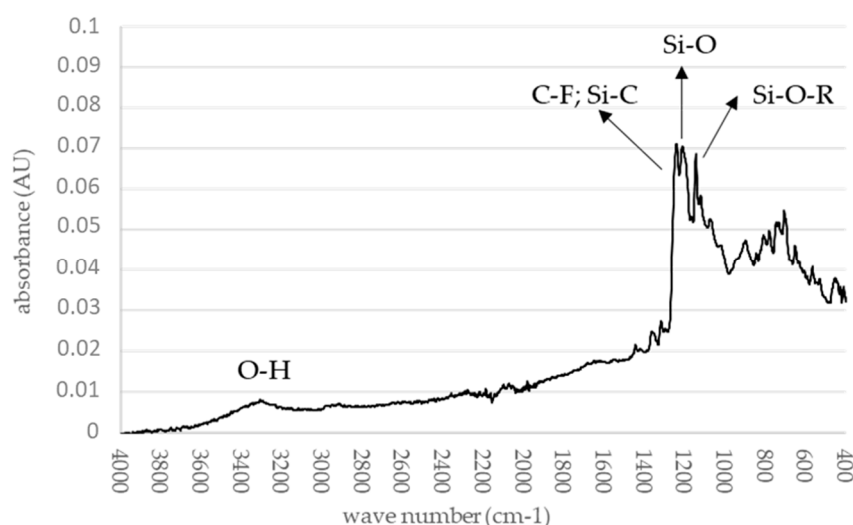

**Figure S6.** FTIR-ATR spectra of HP. The main vibrational bands are indicated.

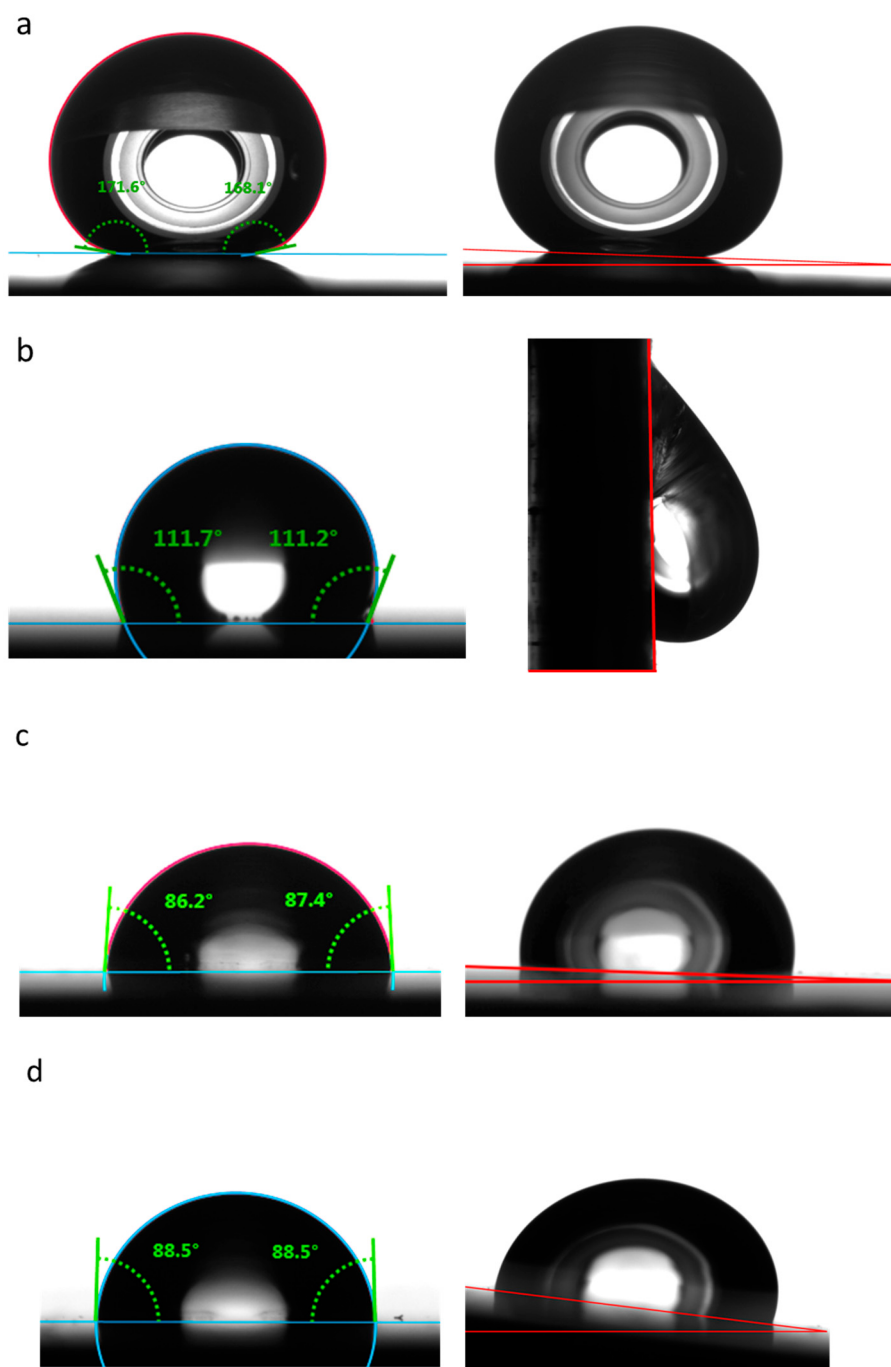

**Figure S7.** Typical water contact angles (WCA, left) and tilt angles (R-O or S-A; right) of: (a) SH; (b) HP; (c) SL-1; (d) SL-2.

**Table S1.** Meteorological and physical data recorded at the WILD station during the snowfall events.

| Number of event             | 1    | 2    | 3    | 4    | 5    | 6    | 7    | 8   | 9    |
|-----------------------------|------|------|------|------|------|------|------|-----|------|
| $T_{ave}[^{\circ}\text{C}]$ | −1.3 | −0.3 | −3.7 | −0.6 | −0.5 | 0.1  | 0.8  | 0.8 | −0.4 |
| $T_{min}[^{\circ}\text{C}]$ | −1.7 | −0.9 | −4.3 | −2.1 | −1.9 | −0.7 | 0.6  | 0.4 | −1.2 |
| $T_{max}[^{\circ}\text{C}]$ | −0.8 | 0.7  | −3.3 | 0.7  | 0.8  | 0.6  | 1.3  | 1.2 | 0.3  |
| $U_r \text{ min}[\%]$       | 81   | 76   | 80   | 77   | 77   | 82   | 84   | 85  | 80   |
| $U_r \text{ max}[\%]$       | 86   | 87   | 83   | 84   | 86   | 87   | 87   | 86  | 85   |
| WE [mm]                     | 45.8 | 12.2 | 12   | 26.8 | 22.8 | 20   | 17.4 | 9.8 | 8    |

|                               |      |      |      |      |      |      |      |      |      |
|-------------------------------|------|------|------|------|------|------|------|------|------|
| H <sub>snow</sub> [mm]        | 420  | 190  | 170  | 270  | 240  | 165  | 41   | 25   | 110  |
| Density [kg/dm <sup>3</sup> ] | 0.11 | 0.06 | 0.07 | 0.10 | 0.10 | 0.12 | 0.42 | 0.39 | 0.07 |
| Dry/wet                       | d    | dw   | d    | dw   | dw   | dw   | w    | w    | d    |
| Max sleeve load [kg/m]        | 5    | 1.1  | 0.9  | 1.3  | 1.6  | 1.35 | 0.4  | 0.2  | 0.7  |
| Max sleeve thickness [cm]     | 13.5 | 8    | 8    | 8    | 10   | 8    | 1.5  | 1    | 6    |

T<sub>ave</sub>: average temperature; T<sub>min</sub>: minimum temperature; T<sub>max</sub>: maximum temperature; U<sub>r min</sub>: relative umidity minimum; U<sub>r max</sub>: relative umidity maximum; WE: water equivalent; H<sub>sow</sub>: heigh of the snow deposition on the ground.
